# Supplementary material for: In-silico investigation on the discovery of synthesized nucleoside-based antivirals against monkeypox and SARS-CoV-2 Virus
Source: Research Square preprint supplement (doi:10.21203/rs.3.rs-3952727/v1), 2024-02-14
Supplement: Supplementary file 1 [file 9b2e00756aec98eeffe3549e.docx]

Table 2: Toxicity prediction and T.E.S.T analysis of synthesized ligands

| **Ligand** | **Pharmacokinetics** | | | | | | | | | **Lipinski** | **Bioavailability Score** | **Mutagenicity** | | **Developmental Toxicity** | | **Oral rat LD50** | |
| --- | --- | --- | --- | --- | --- | --- | --- | --- | --- | --- | --- | --- | --- | --- | --- | --- | --- |
|  | **GI absorption** | **BBB permeant** | **P-gp substrate** | **CYP1A2 inhibitor** | **CYP2C19 inhibitor** | **CYP2C9 inhibitor** | **CYP2D6 inhibitor** | **CYP3A4 inhibitor** | **Log *K*p**  **(skin permeation)** | **value** | **result** | **value** | **result** | **Oral rat LD50 -Log10(mol/kg)** | **Oral rat LD50 mg/kg** |
| 1 | High |  |  |  |  |  |  |  | -8.57 cm/s |  | 0.55 | 0.13 |  | 0.77 | toxicant | 2.7 | 304.72 |
| 2 | High |  |  |  |  |  |  |  | -8.32 cm/s |  | 0.55 | 0.21 |  | 0.68 | toxicant | NP | NP |
| 7-amino-A | High |  |  |  |  |  |  |  | -8.37 cm/s |  | 0.55 | NA | NA | 0.51 | toxicant | 2.6 | 375.62 |
| 7-amino-G | High |  |  |  |  |  |  |  | -7.94 cm/s |  | 0.55 | NA | NA | NA | NA | NA | NA |
| 7-Bromo-A | High |  |  |  |  |  |  |  | -7.78 cm/s |  | 0.55 | 0.13 |  | 0.46 | Non-toxicant | NA | NA |
| 7-Bromo-G | High |  |  |  |  |  |  |  | -7.75 cm/s |  | 0.55 | NA | NA | NA | NA | NA | NA |
| 7-Fluro-A | High |  |  |  |  |  |  |  | -7.83 cm/s |  | 0.55 | 0.14 |  | 0.27 | Non-toxicant | NA | NA |
| 7-Fluro-G | High |  |  |  |  |  |  |  | -7.79 cm/s |  | 0.55 | NA | NA | NA | NA | NA | NA |
| 7-Iodo-A | High |  |  |  |  |  |  |  | -8.10 cm/s |  | 0.55 | NA | NA | 0.18 | Non-toxicant | NA | NA |
| 7-Iodo-G | High |  |  |  |  |  |  |  | -8.06 cm/s |  | 0.55 | NA | NA | NA | NA | NA | NA |
| 8-amino-A | High |  |  |  |  |  |  |  | -8.57 cm/s |  | 0.55 | 0.13 |  | 0.77 | toxicant | 2.7 | 304.72 |
| 8-amino-G | High |  |  |  |  |  |  |  | -8.32 cm/s |  | 0.55 | 0.21 |  | 0.68 | toxicant | NA | NA |
| 8-Bromo-A | High |  |  |  |  |  |  |  | -7.98 cm/s |  | 0.55 | 0.29 |  | 0.03 | Non-toxicant | NA | NA |
| 8-Bromo-G | High |  |  |  |  |  |  |  | -7.74 cm/s |  | 0.55 | 0.27 |  | 0.21 | Non-toxicant | NA | NA |
| 8-Fluro-A | High |  |  |  |  |  |  |  | -8.03 cm/s |  | 0.55 | 0.12 |  | 0.51 | toxicant | 2.36 | 669.55 |
| 8-Fluro-G | High |  |  |  |  |  |  |  | -7.79 cm/s |  | 0.55 | 0.41 |  | 0.62 | toxicant | NA | NA |
| 8-Iodo-A | High |  |  |  |  |  |  |  | -8.51 cm/s |  | 0.55 | NA | NA | NA | NA | NA | NA |
| 8-Iodo-G | High |  |  |  |  |  |  |  | -8.27 cm/s |  | 0.55 | NA | NA | NA | NA | NA | NA |

[ Yes- ; No- ]
